# Supplementary material
Source: PubMed Central journal article supplement (PMC4347345)
Supplement: SD6.pdf [file SD6.pdf]

SUPPLEMENTAL TABLE 1  
West Nile virus isolations from North Dakota mosquitoes, 2003–2006

| Mosquito species                 | Year     | County         | Total no. mosquitoes (pools) | No. virus isolations | Infection rate* (95% CI) |
|----------------------------------|----------|----------------|------------------------------|----------------------|--------------------------|
| <i>Aedes vexans</i>              | 2003     | Cass           | 134,510 (2,762)              | 26                   | 0.19 (0.13–0.28)         |
|                                  | 2004     | Cass           | 235,569 (5,442)              | 3                    | 0.01 (0.00–0.03)         |
|                                  |          | Williams       | 260,426 (5,265)              | 3                    | 0.01 (0.00–0.03)         |
|                                  | 2005     | Cass           | 455,439 (9,505)              | 6                    | 0.01 (0.01–0.03)         |
|                                  |          | Williams       | 1,022,184 (20,640)           | 16                   | 0.02 (0.01–0.02)         |
| <i>Coquillettidia perturbans</i> | 2006     | Williams       | 591,152 (11,947)             | 1                    | 0.002 (0.00–0.1)         |
|                                  | 2005     | Williams       | 1,893 (142)                  | 1                    | 0.53 (0.03–2.54)         |
| <i>Culex tarsalis</i>            | 2003     | Cass           | 1,935 (151)                  | 10                   | 5.57 (2.85–9.95)         |
|                                  |          | Nelson         | 678 (79)                     | 2                    | 2.94 (0.54–9.51)         |
|                                  |          | Richland       | 415 (17)                     | 1                    | 2.32 (0.14–11.21)        |
|                                  | 2004     | Cass           | 13,733 (423)                 | 15                   | 1.12 (0.65–1.80)         |
|                                  |          | Williams       | 6,616 (204)                  | 10                   | 1.56 (0.80–2.79)         |
| 2005                             | Cass     | 38,435 (1,161) | 56                           | 1.51 (1.15–1.94)     |                          |
|                                  | Williams | 10,023 (388)   | 22                           | 2.30 (1.48–3.43)     |                          |
| <i>Culiseta inornata</i>         | 2006     | Williams       | 478 (82)                     | 5                    | 12.26 (4.53–27.94)       |
| <i>Ochlerotatus dorsalis</i>     | 2005     | Cass           | 11,769 (447)                 | 2                    | 0.17 (0.03–0.56)         |
| <i>Ochlerotatus flavescens</i>   | 2005     | Cass           | 26,767 (743)                 | 1                    | 0.04 (0.00–0.18)         |
| <i>Ochlerotatus spencerii</i>    | 2005     | Cass           | 178 (56)                     | 1                    | 5.61 (0.32–26.94)        |
| <i>Ochlerotatus triseriatus</i>  | 2005     | Cass           | 110 (47)                     | 1                    | 9.10 (0.53–43.45)        |
| <i>Ochlerotatus trivittatus</i>  | 2003     | Cass           | 92 (27)                      | 1                    | 10.61 (0.63–49.88)       |
| <i>Ochlerotatus trivittatus</i>  | 2004     | Cass           | 91,993 (2,007)               | 1                    | 0.01 (0.00–0.05)         |
|                                  | 2005     | Williams       | 35,645 (872)                 | 2                    | 0.06 (0.01–0.18)         |

\*Maximum likelihood estimate of the infection rate.<sup>1</sup>

SUPPLEMENTAL TABLE 2  
Risk of seven North Dakota species transmitting West Nile virus to humans, 2003–2006

| Species                          | Relative abundance* | WNV infection rate (IR)** | Vector competence                                                                                  | Fraction mammal                                                                                                                                                                                                                                                                                                                                                                                                             | Risk*** | % Risk |
|----------------------------------|---------------------|---------------------------|----------------------------------------------------------------------------------------------------|-----------------------------------------------------------------------------------------------------------------------------------------------------------------------------------------------------------------------------------------------------------------------------------------------------------------------------------------------------------------------------------------------------------------------------|---------|--------|
| <i>Aedes vexans</i>              | 83.2                | 0.019                     | 0.17 <sup>2</sup> ,<br>0.63 <sup>3</sup> ,<br>0.71 <sup>4</sup> ,<br>Ave = 0.50                    | 0.96 <sup>5</sup> , 0.88 <sup>6</sup> ,<br>1.0 <sup>7</sup> , 0.99 <sup>8</sup> ,<br>0.92 <sup>9</sup> , 0.82 <sup>10</sup> ,<br>0.99 <sup>11</sup> , 0.95 <sup>12</sup> ,<br>0.95 <sup>13</sup> , 0.99 <sup>14</sup> ,<br>1.0 <sup>15</sup> , 0.83 <sup>16</sup> ,<br>1.0 <sup>17</sup> , 0.98 <sup>18</sup> ,<br>0.94 <sup>19</sup> , 0.97 <sup>20</sup> ,<br>Ave. = 0.95                                                 | 0.751   | 34.0   |
| <i>Coquillettidia perturbans</i> | 0.2                 | 0.21                      | 0.12 <sup>21</sup>                                                                                 | 0.87 <sup>22</sup> , 1.0 <sup>23</sup> ,<br>0.57 <sup>24</sup> , 1.0 <sup>6</sup> ,<br>0.91 <sup>14</sup> , 1.0 <sup>17</sup> ,<br>1.0 <sup>25</sup> , 0.83 <sup>15</sup> ,<br>1.0 <sup>16</sup> , 0.97 <sup>18</sup> ,<br>1.0 <sup>19</sup> ,<br>Ave. = 0.92                                                                                                                                                               | 0.003   | 0.1    |
| <i>Culex tarsalis</i>            | 2.2                 | 1.73                      | 0.81 <sup>4</sup> , 0.72 <sup>4</sup> ,<br>0.76 <sup>26</sup> , 0.96 <sup>26</sup> ,<br>Ave = 0.81 | 0.77 <sup>25</sup> , 0.83 <sup>8</sup> ,<br>.56 <sup>27</sup> , 0.85 <sup>10</sup> ,<br>.36 <sup>23</sup> , 0.10 <sup>28</sup> ,<br>0.38 <sup>11</sup> , 0.12 <sup>29</sup> ,<br>0.32 <sup>12</sup> , 0.41 <sup>30</sup> ,<br>0.51 <sup>13</sup> , 0.40 <sup>31</sup> ,<br>0.20 <sup>5</sup> , 0.83 <sup>8</sup> ,<br>0.85 <sup>10</sup> , 0.18 <sup>32</sup> ,<br>0.15 <sup>33</sup> , 0.20 <sup>34</sup> ,<br>Ave. = 0.45 | 1.356   | 61.4   |
| <i>Culiseta inornata</i>         | .9                  | 0.07                      | 0.29 <sup>4</sup>                                                                                  | 0.98 <sup>8</sup> , 0.99 <sup>10</sup> ,<br>0.99 <sup>27</sup> , 0.98 <sup>35</sup> ,<br>0.99 <sup>11</sup> , 1.0 <sup>12</sup> ,<br>1.0 <sup>30</sup> , 1.0 <sup>13</sup> ,<br>1.0 <sup>36</sup> ,<br>Ave. = 0.99                                                                                                                                                                                                          | 0.017   | 0.8    |
| <i>Ochlerotatus dorsalis</i>     | 1.7                 | 0.02                      | 0.83 <sup>4</sup>                                                                                  | 0.81 <sup>8</sup> , 1.0 <sup>13</sup> ,<br>0.97 <sup>10</sup> , 1.0 <sup>11</sup> ,<br>Ave. = 0.94                                                                                                                                                                                                                                                                                                                          | 0.026   | 1.2    |

(continued)

SUPPLEMENTAL TABLE 2  
Continued

| Species                          | Relative abundance* | WNV infection rate (IR)** | Vector competence  | Fraction mammal                                                                                                                                 | Risk*** | % Risk |
|----------------------------------|---------------------|---------------------------|--------------------|-------------------------------------------------------------------------------------------------------------------------------------------------|---------|--------|
| <i>Ochlerotatus. triseriatus</i> | <0.1                | 3.87                      | 0.50 <sup>37</sup> | .92 <sup>22</sup> , 1.0 <sup>15</sup> ,<br>0.22 <sup>16</sup> , 0.94 <sup>38</sup> ,<br>0.92 <sup>18</sup> , 1.0 <sup>20</sup> ,<br>Ave. = 0.84 | .017    | 0.8    |
| <i>Ochlerotatus. trivittatus</i> | 7.7                 | 0.01                      | 0.54 <sup>39</sup> | 1.0 <sup>8</sup> , 90 <sup>40</sup> ,<br>1.0 <sup>18</sup> ,<br>0.95 <sup>22</sup> , 0.91 <sup>5</sup> ,<br>Ave. = 0.95                         | 0.039   | 1.8    |

\*From Table 1.

\*\*Maximum likelihood estimate of the infection rate (MLE).<sup>1</sup> Mosquito pools combined over 4 years. The number of mosquito pools for *Aedes vexans* was too large for the program of MLE. We divided the number of pools into two groups, determined the MLE for each group, added the two MLEs, and divided by 2 to obtain the IR for *Aedes vexans*.

\*\*\*Risk=Abundance X WNV IR X Vector competence X Fraction feeding on mammals.<sup>41</sup>

SUPPLEMENTAL TABLE 3

Risk of six species transmitting West Nile virus to humans in Cass County North Dakota in 2003, 2004, and 2005

| Year | Species                         | Relative abundance | WNV infection rate (IR)* | Vector competence** | Fraction feeding on mammals** | Risk*** | % Risk |
|------|---------------------------------|--------------------|--------------------------|---------------------|-------------------------------|---------|--------|
| 2003 | <i>Aedes vexans</i>             | 87.9               | 0.19                     | 0.50                | 0.95                          | 7.93    | 73.6   |
|      | <i>Culex tarsalis</i>           | 1.3                | 5.57                     | 0.81                | 0.45                          | 2.58    | 23.9   |
|      | <i>Ochlerotatus triseriatus</i> | 0.1                | 10.61                    | 0.50                | 0.84                          | 0.27    | 2.5    |
| 2004 | <i>Aedes vexans</i>             | 67.3               | 0.02                     | 0.50                | 0.95                          | 0.64    | 24.8   |
|      | <i>Culex tarsalis</i>           | 4.4                | 0.99                     | 0.81                | 0.45                          | 1.58    | 61.3   |
|      | <i>Ochlerotatus trivittatus</i> | 23.6               | 0.03                     | 0.54                | 0.95                          | 0.36    | 13.9   |
| 2005 | <i>Aedes vexans</i>             | 63.1               | 0.03                     | 0.50                | 0.95                          | 0.90    | 17.3   |
|      | <i>Culex tarsalis</i>           | 5.1                | 2.16                     | 0.81                | 0.45                          | 3.99    | 76.6   |
|      | <i>Culiseta inornata</i>        | 2.9                | 0.17                     | 0.29                | 0.99                          | 0.14    | 2.7    |
|      | <i>Ochlerotatus dorsalis</i>    | 6.0                | 0.04                     | 0.83                | 0.94                          | 0.18    | 3.4    |

\*Maximum likelihood estimate of the infection rate (MLE).<sup>1</sup>

\*\*Data obtained from Supplemental Table 2.

\*\*\*Risk=Abundance X WNV IR X Vector competence X Fraction feeding on mammals.<sup>41</sup>

SUPPLEMENTAL TABLE 4

Weekly risk for *Culex tarsalis*, *Aedes vexans*, and five other infected species\* in transmitting West Nile virus to humans, North Dakota, 2003–2006

| Date**           | Species               | Relative abundance | WNV infection rate (IR)*** | Vector competence‡ | Fraction mammal§ | Risk¶ | % Risk |
|------------------|-----------------------|--------------------|----------------------------|--------------------|------------------|-------|--------|
| 16–22 June       | <i>Culex tarsalis</i> | 0.2                | 0                          | 0.81               | 0.45             | 0     | 0      |
|                  | <i>Aedes vexans</i>   | 87.8               | 0.005                      | 0.5                | 0.95             | 0.21  | 70.1   |
|                  | Other species         | 6.9                | 0.03                       | 0.47               | 0.93             | 0.09  | 29.9   |
| 30 June–6 July   | <i>Culex tarsalis</i> | 1.3                | 0.93                       | 0.81               | 0.45             | 0.45  | 100    |
|                  | <i>Aedes vexans</i>   | 83.9               | 0                          | 0.5                | 0.95             | 0     | 0      |
|                  | Other species         | 13.9               | 0                          | 0.47               | 0.93             | 0     | 0      |
| 7–13 July        | <i>Culex tarsalis</i> | 1.5                | 0.25                       | 0.81               | 0.45             | 0.13  | 26.0   |
|                  | <i>Aedes vexans</i>   | 78.1               | 0.01                       | 0.5                | 0.95             | 0.37  | 74.0   |
|                  | Other species         | 15.3               | 0                          | 0.47               | .93              | 0     | 0      |
| 14–20 July       | <i>Culex tarsalis</i> | 2.3                | 1.32                       | 0.81               | 0.45             | 1.09  | 50.5   |
|                  | <i>Aedes vexans</i>   | 86.5               | 0.02                       | 0.5                | 0.95             | 0.82  | 38.0   |
|                  | Other species         | 8.2                | 0.07                       | 0.47               | 0.93             | 0.25  | 11.6   |
| 21–27 July       | <i>Culex tarsalis</i> | 8.7                | 1.08                       | 0.81               | 0.45             | 3.44  | 58.1   |
|                  | <i>Aedes vexans</i>   | 74.5               | 0.07                       | 0.5                | 0.95             | 2.48  | 41.9   |
|                  | Other species         | 13.2               | 0                          | 0.47               | 0.93             | 0     | 0      |
| 28 July–3 August | <i>Culex tarsalis</i> | 7.3                | 1.43                       | 0.81               | 0.45             | 3.80  | 42.2   |
|                  | <i>Aedes vexans</i>   | 73.4               | 0.14                       | 0.5                | 0.95             | 4.88  | 54.2   |
|                  | Other species         | 18.0               | 0.04                       | 0.47               | 0.93             | 0.32  | 3.6    |
| 4–10 August      | <i>Culex tarsalis</i> | 7.2                | 2.75                       | 0.81               | 0.45             | 7.23  | 61.1   |
|                  | <i>Aedes vexans</i>   | 81.9               | 0.11                       | 0.5                | 0.95             | 4.28  | 36.2   |
|                  | Other species         | 9.2                | 0.08                       | 0.47               | 0.93             | 0.32  | 2.7    |
| 11–17 August     | <i>Culex tarsalis</i> | 7.0                | 3.96                       | 0.81               | 0.45             | 10.16 | 89.7   |
|                  | <i>Aedes vexans</i>   | 82.0               | 0.03                       | 0.5                | 0.95             | 1.17  | 10.3   |
|                  | Other species         | 7.7                | 0                          | 0.47               | 0.93             | 0     | 0      |
| 18–24 August     | <i>Culex tarsalis</i> | 6.7                | 4.98                       | 0.81               | 0.45             | 12.13 | 83.9   |
|                  | <i>Aedes vexans</i>   | 84.1               | 0.04                       | 0.5                | 0.95             | 1.60  | 11.1   |
|                  | Other species         | 8.3                | 0.2                        | 0.47               | 0.93             | 0.73  | 5.0    |

(continued)

SUPPLEMENTAL TABLE 4  
Continued

| Date**         | Species               | Relative abundance | WNV infection rate (IR)*** | Vector competence‡ | Fraction mammal§ | Risk¶ | % Risk |
|----------------|-----------------------|--------------------|----------------------------|--------------------|------------------|-------|--------|
| 25–31 August   | <i>Culex tarsalis</i> | 17.3               | 3.93                       | 0.81               | 0.45             | 24.77 | 78.9   |
|                | <i>Aedes vexans</i>   | 60                 | 0.16                       | 0.5                | 0.95             | 4.56  | 14.5   |
|                | Other species         | 19.8               | 0.24                       | 0.47               | 0.93             | 2.08  | 6.6    |
| 1–7 September  | <i>Culex tarsalis</i> | 1.2                | 8.07                       | 0.81               | 0.45             | 3.56  | 64.5   |
|                | <i>Aedes vexans</i>   | 82.4               | 0.05                       | 0.5                | 0.95             | 1.96  | 35.5   |
|                | Other species         | 15.9               | 0                          | 0.47               | 0.93             | 0     | 0      |
| 8–14 September | <i>Culex tarsalis</i> | 0.3                | 5.64                       | 0.81               | 0.45             | 0.58  | 40.0   |
|                | <i>Aedes vexans</i>   | 91.8               | 0.02                       | 0.5                | 0.95             | 0.87  | 60.0   |
|                | Other species         | 7.7                | 0                          | 0.47               | 0.93             | 0     | 0      |

\* *Coquillettidia perturbans*, *Culiseta inornata*, *Ochlerotatus dorsalis*, *Ochlerotatus triseriatus*, and *Ochlerotatus trivittatus*.

\*\* No isolations made on June 23–29; data not shown.

\*\*\* Maximum likelihood estimate of the infection rate (MLE).<sup>1</sup>

‡ Data for *Cx. tarsalis* and *Ae. vexans* taken from Vector competence column in Supplemental Table 2. Data for other species obtained by taking numbers from Vector competence column in Supplemental Table 2 for *Coquillettidia perturbans*, *Culiseta inornata*, *Ochlerotatus dorsalis*, *Ochlerotatus triseriatus*, and *Ochlerotatus trivittatus* and dividing sum by 5.

§ Data for *Cx. tarsalis* and *Ae. vexans* taken from Fraction mammal column in Supplemental Table 2. Data for other species obtained by taking numbers from Fraction mammal column in Supplemental Table 2 for *Coquillettidia perturbans*, *Culiseta inornata*, *Ochlerotatus dorsalis*, *Ochlerotatus triseriatus*, and *Ochlerotatus trivittatus* and dividing sum by 5.

¶ Risk = Abundance X WNV infection rate X Vector competence X Fraction feeding on mammals.<sup>41</sup>

SUPPLEMENTAL TABLE 5

Weekly vector index for *Culex tarsalis*, *Aedes vexans*, and seven other infected species\* in transmitting West Nile virus to humans, North Dakota, 2003

| Date**           | Species               | Ave. per trap | WNV infection rate*** | Vector Index**** |
|------------------|-----------------------|---------------|-----------------------|------------------|
| 30 June–6 July   | <i>Culex tarsalis</i> | 26.9          | 3.36                  | 0.09             |
|                  | <i>Aedes vexans</i>   | 3,769.9       | 0                     | 0.00             |
|                  | Other species         | 128.4         | 0                     | 0.00             |
| 7–13 July        | <i>Culex tarsalis</i> | 8.4           | 0                     | 0.00             |
|                  | <i>Aedes vexans</i>   | 3,830.7       | 0                     | 0.00             |
|                  | Other species         | 235.7         | 0                     | 0.00             |
| 14–20 July       | <i>Culex tarsalis</i> | 107.7         | 4.68                  | 0.50             |
|                  | <i>Aedes vexans</i>   | 11,752.7      | 0                     | 0.00             |
|                  | Other species         | 2,868.5       | 0                     | 0.00             |
| 21–27 July       | <i>Culex tarsalis</i> | 113           | 2.26                  | 0.26             |
|                  | <i>Aedes vexans</i>   | 4,039.2       | 0.19                  | 0.77             |
|                  | Other species         | 830.2         | 0                     | 0.00             |
| 28 July–3 August | <i>Culex tarsalis</i> | 116.2         | 1.67                  | 0.19             |
|                  | <i>Aedes vexans</i>   | 3,719.6       | 0.6                   | 2.23             |
|                  | Other species         | 284.8         | 0                     | 0.00             |
| 4–10 August      | <i>Culex tarsalis</i> | 45.2          | 9.44                  | 0.43             |
|                  | <i>Aedes vexans</i>   | 4,543.4       | 0.4                   | 1.82             |
|                  | Other species         | 299           | 0                     | 0.00             |
| 11–17 August     | <i>Culex tarsalis</i> | 20.6          | 4.31                  | 0.09             |
|                  | <i>Aedes vexans</i>   | 642.8         | 0.16                  | 0.10             |
|                  | Other species         | 7.6           | 12.71                 | 0.10             |
| 18–24 August     | <i>Culex tarsalis</i> | 39.2          | 5.26                  | 0.21             |
|                  | <i>Aedes vexans</i>   | 221.8         | 0.9                   | 0.20             |
|                  | Other species         | 3.4           | 0                     | 0.00             |
| 25–31 August     | <i>Culex tarsalis</i> | 48.5          | 19.6                  | 0.95             |
|                  | <i>Aedes vexans</i>   | 71.7          | 3.48                  | 0.25             |
|                  | Other species         | 4.25          | 0                     | 0.00             |
| 8–14 September   | <i>Culex tarsalis</i> | 0.8           | 0                     | 0.00             |
|                  | <i>Aedes vexans</i>   | 25.6          | 0                     | 0.00             |
|                  | Other species         | 9.8           | 0                     | 0.00             |

\* The other species were: *Coquillettidia perturbans*, *Culiseta inornata*, *Ochlerotatus dorsalis*, *Ochlerotatus flavescens*, *Ochlerotatus spencerii*, *Ochlerotatus triseriatus*, and *Ochlerotatus trivittatus*.

\*\* Mosquitoes were not collected during the week of 1–7 September.

\*\*\* Maximum likelihood estimate of the infection rate (MLE).<sup>1</sup>

\*\*\*\* Vector Index = Average number per trap X WNV infection rate /1000.<sup>42</sup>

SUPPLEMENTAL TABLE 6

Weekly vector index for *Culex tarsalis*, *Aedes vexans*, and seven other infected species\* in transmitting West Nile virus to humans, North Dakota, 2004

| Date             | Species               | Ave. per trap | WNV infection rate** | Vector Index*** |
|------------------|-----------------------|---------------|----------------------|-----------------|
| 16–22 June       | <i>Culex tarsalis</i> | 1.7           | 0                    | 0               |
|                  | <i>Aedes vexans</i>   | 799.3         | 0                    | 0               |
|                  | Other species         | 1,637.8       | 0                    | 0               |
| 23–29 June       | <i>Culex tarsalis</i> | 2.6           | 0                    | 0               |
|                  | <i>Aedes vexans</i>   | 290.7         | 0                    | 0               |
|                  | Other species         | 328.7         | 0                    | 0               |
| 30 June–6 July   | <i>Culex tarsalis</i> | 43.2          | 0                    | 0               |
|                  | <i>Aedes vexans</i>   | 10,027.6      | 0                    | 0               |
|                  | Other species         | 1,198.6       | 0                    | 0               |
| 7–13 July        | <i>Culex tarsalis</i> | 201.5         | 0.56                 | 0.11            |
|                  | <i>Aedes vexans</i>   | 4,518.6       | 0.02                 | 0.09            |
|                  | Other species         | 456.2         | 0                    | 0               |
| 14–20 July       | <i>Culex tarsalis</i> | 164.6         | 1.24                 | 0.20            |
|                  | <i>Aedes vexans</i>   | 3,823.0       | 0.01                 | 0.04            |
|                  | Other species         | 412.0         | 0                    | 0               |
| 21–27 July       | <i>Culex tarsalis</i> | 185.7         | 0.97                 | 0.18            |
|                  | <i>Aedes vexans</i>   | 1,857.9       | 0.03                 | 0.06            |
|                  | Other species         | 603.3         | 0                    | 0               |
| 28 July–3 August | <i>Culex tarsalis</i> | 364.8         | 1.25                 | 0.46            |
|                  | <i>Aedes vexans</i>   | 1,80.9        | 0.05                 | 0.06            |
|                  | Other species         | 1,234.2       | 0                    | 0               |
| 4–10 August      | <i>Culex tarsalis</i> | 49.8          | 0                    | 0               |
|                  | <i>Aedes vexans</i>   | 346.7         | 0                    | 0               |
|                  | Other species         | 253.0         | 0                    | 0               |
| 11–17 August     | <i>Culex tarsalis</i> | 86.2          | 3.46                 | 0.30            |
|                  | <i>Aedes vexans</i>   | 1,009.9       | 0                    | 0               |
|                  | Other species         | 156.2         | 0                    | 0               |
| 18–24 August     | <i>Culex tarsalis</i> | 22.1          | 4.92                 | 0.11            |
|                  | <i>Aedes vexans</i>   | 590.8         | 0                    | 0               |
|                  | Other species         | 157.7         | 0.33                 | 0.05            |
| 25–31 August     | <i>Culex tarsalis</i> | 5.8           | 0                    | 0               |
|                  | <i>Aedes vexans</i>   | 344.8         | 0.18                 | 0.06            |
|                  | Other species         | 49.9          | 0                    | 0               |
| 1–7 September    | <i>Culex tarsalis</i> | 2.6           | 0                    | 0               |
|                  | <i>Aedes vexans</i>   | 222.4         | 0                    | 0               |
|                  | Other species         | 101.8         | 0                    | 0               |
| 8–14 September   | <i>Culex tarsalis</i> | 2.7           | 21.31                | 0.06            |
|                  | <i>Aedes vexans</i>   | 670.9         | 0                    | 0               |
|                  | Other species         | 42.2          | 0                    | 0               |

\*The other species were: *Coquillettia perturbans*, *Culiseta inornata*, *Ochlerotatus dorsalis*, *Ochlerotatus flavescens*, *Ochlerotatus spencerii*, *Ochlerotatus triseriatus*, and *Ochlerotatus trivittatus*.

\*\*Maximum likelihood estimate of the infection rate (MLE).<sup>1</sup>

\*\*\*Vector Index = Average number per trap X WNV infection rate /1000.<sup>42</sup>

SUPPLEMENTAL TABLE 7

Weekly vector index for *Culex tarsalis*, *Aedes vexans*, and seven other infected species\* in transmitting West Nile virus to humans, North Dakota, 2005

| Date             | Species               | Ave. per trap | WNV infection rate** | Vector Index*** |
|------------------|-----------------------|---------------|----------------------|-----------------|
| 16–22 June       | <i>Culex tarsalis</i> | 11            | 0                    | 0               |
|                  | <i>Aedes vexans</i>   | 1,902.8       | 0.03                 | 0.06            |
|                  | Other species         | 441.5         | 0.11                 | 0.05            |
| 23–29 June       | <i>Culex tarsalis</i> | 15.7          | 0                    | 0               |
|                  | <i>Aedes vexans</i>   | 5,367.1       | 0                    | 0               |
|                  | Other species         | 1,669.9       | 0                    | 0               |
| 30 June–6 July   | <i>Culex tarsalis</i> | 350.3         | 0.8                  | 0.28            |
|                  | <i>Aedes vexans</i>   | 12,438.8      | 0                    | 0               |
|                  | Other species         | 2,200.1       | 0                    | 0               |
| 7–13 July        | <i>Culex tarsalis</i> | 304.7         | 0.12                 | 0.04            |
|                  | <i>Aedes vexans</i>   | 9,434.8       | 0.004                | 0.04            |
|                  | Other species         | 605.0         | 0                    | 0               |
| 14–20 July       | <i>Culex tarsalis</i> | 316.1         | 1.07                 | 0.34            |
|                  | <i>Aedes vexans</i>   | 12,899.3      | 0.02                 | 0.26            |
|                  | Other species         | 594.0         | 0.22                 | 0.13            |
| 21–27 July       | <i>Culex tarsalis</i> | 282.0         | 0.8                  | 0.23            |
|                  | <i>Aedes vexans</i>   | 1,371.1       | 0.08                 | 0.11            |
|                  | Other species         | 132.1         | 0                    | 0               |
| 28 July–3 August | <i>Culex tarsalis</i> | 223.2         | 1.79                 | 0.40            |
|                  | <i>Aedes vexans</i>   | 4,637.3       | 0.03                 | 0.14            |
|                  | Other species         | 103.2         | 0.74                 | 0.08            |
| 4–10 August      | <i>Culex tarsalis</i> | 363.0         | 2.56                 | 0.93            |
|                  | <i>Aedes vexans</i>   | 3,486.2       | 0.05                 | 0.17            |
|                  | Other species         | 336.2         | 0.24                 | 0.08            |
| 11–17 August     | <i>Culex tarsalis</i> | 95.2          | 4.34                 | 0.41            |
|                  | <i>Aedes vexans</i>   | 799.3         | 0                    | 0               |
|                  | Other species         | 50.4          | 0                    | 0               |
| 18–24 August     | <i>Culex tarsalis</i> | 169.5         | 4.93                 | 0.84            |
|                  | <i>Aedes vexans</i>   | 1,902.8       | 0.03                 | 0.06            |
|                  | Other species         | 95.2          | 0                    | 0               |
| 25–31 August     | <i>Culex tarsalis</i> | 174.1         | 3.25                 | 0.57            |
|                  | <i>Aedes vexans</i>   | 349.6         | 0                    | 0               |
|                  | Other species         | 173.5         | 0.3                  | 0.05            |
| 1–7 September    | <i>Culex tarsalis</i> | 29.1          | 8.5                  | 0.25            |
|                  | <i>Aedes vexans</i>   | 1,952.4       | 0.06                 | 0.12            |
|                  | Other species         | 341.6         | 0                    | 0               |
| 8–14 September   | <i>Culex tarsalis</i> | 4.9           | 0                    | 0               |
|                  | <i>Aedes vexans</i>   | 1,794.5       | 0.02                 | 0.04            |
|                  | Other species         | 159.0         | 0                    | 0               |

\*The other species were: *Coquillettia perturbans*, *Culiseta inornata*, *Ochlerotatus dorsalis*, *Ochlerotatus flavescens*, *Ochlerotatus spencerii*, *Ochlerotatus triseriatus*, and *Ochlerotatus trivittatus*.\*\*Maximum likelihood estimate of the infection rate (MLE).<sup>1</sup>\*\*\*Vector Index = Average number per trap X WNV infection rate /1000.<sup>42</sup>

SUPPLEMENTAL TABLE 8

Weekly vector index for *Culex tarsalis*, *Aedes vexans*, and seven other infected species\* in transmitting West Nile virus to humans, North Dakota, 2006

| Date**                | Species               | Ave. per trap | WNV infection rate*** | Vector Index**** |
|-----------------------|-----------------------|---------------|-----------------------|------------------|
| 4–10 June             | <i>Culex tarsalis</i> | 1.2           | 0                     | 0                |
|                       | <i>Aedes vexans</i>   | 13,016.3      | 0                     | 0                |
|                       | Other species         | 581.0         | 0                     | 0                |
| 11–17 June            | <i>Culex tarsalis</i> | 1.0           | 0                     | 0                |
|                       | <i>Aedes vexans</i>   | 13,440.3      | 0                     | 0                |
|                       | Other species         | 291.3         | 0                     | 0                |
| 18–24 June            | <i>Culex tarsalis</i> | 0.0           | 0                     | 0                |
|                       | <i>Aedes vexans</i>   | 930.3         | 0                     | 0                |
|                       | Other species         | 53.0          | 0                     | 0                |
| 25 June–1 July        | <i>Culex tarsalis</i> | 2.8           | 0                     | 0                |
|                       | <i>Aedes vexans</i>   | 41,448.8      | 0                     | 0                |
|                       | Other species         | 949.0         | 0                     | 0                |
| 9–15 July             | <i>Culex tarsalis</i> | 19.5          | 0                     | 0                |
|                       | <i>Aedes vexans</i>   | 39,677.0      | 0.01                  | 0.40             |
|                       | Other species         | 833.8         | 0                     | 0                |
| 16–22 July            | <i>Culex tarsalis</i> | 7.0           | 0                     | 0                |
|                       | <i>Aedes vexans</i>   | 732.8         | 0                     | 0                |
|                       | Other species         | 33.5          | 0                     | 0                |
| 23–29 July            | <i>Culex tarsalis</i> | 29.3          | 30.49                 | 0.89             |
|                       | <i>Aedes vexans</i>   | 39,260.0      | 0                     | 0                |
|                       | Other species         | 34.0          | 0                     | 0                |
| 30 Jul–5 August       | <i>Culex tarsalis</i> | 1.2           | 0                     | 0                |
|                       | <i>Aedes vexans</i>   | 187.8         | 0                     | 0                |
|                       | Other species         | 6.5           | 0                     | 0                |
| 6–12 August           | <i>Culex tarsalis</i> | 29.8          | 19.57                 | 0.58             |
|                       | <i>Aedes vexans</i>   | 296.2         | 0                     | 0                |
|                       | Other species         | 7.2           | 0                     | 0                |
| 13–19 August          | <i>Culex tarsalis</i> | 1.3           | 0                     | 0                |
|                       | <i>Aedes vexans</i>   | 2.3           | 0                     | 0                |
|                       | Other species         | 4.8           | 0                     | 0                |
| 20–26 August          | <i>Culex tarsalis</i> | 3.6           | 0                     | 0                |
|                       | <i>Aedes vexans</i>   | 50.8          | 0                     | 0                |
|                       | Other species         | 19.8          | 0                     | 0                |
| 27 August–2 September | <i>Culex tarsalis</i> | 0.2           | 0                     | 0                |
|                       | <i>Aedes vexans</i>   | 4.8           | 0                     | 0                |
|                       | Other species         | 14.7          | 0                     | 0                |
| 3–7 September         | <i>Culex tarsalis</i> | 0.0           | 0                     | 0                |
|                       | <i>Aedes vexans</i>   | 8.8           | 0                     | 0                |
|                       | Other species         | 6.7           | 0                     | 0                |

\*The other species were: *Coquillettia perturbans*, *Culiseta inornata*, *Ochlerotatus dorsalis*, *Ochlerotatus flavescens*, *Ochlerotatus spencerii*, *Ochlerotatus triseriatus*, and *Ochlerotatus trivittatus*.

\*\*Mosquitoes were not collected during the week of 1–8 July.

\*\*\*Maximum likelihood estimate of the infection rate (MLE).<sup>1</sup>

\*\*\*\*Vector Index = Average number per trap X WNV infection rate /1000.<sup>42</sup>

SUPPLEMENTAL TABLE 9

Weekly vector index for *Culex tarsalis*, *Aedes vexans*, and seven other infected species\* in transmitting West Nile virus to humans, North Dakota, 2003–2006

| Date             | Species               | Ave. per trap | WNV infection rate** | Vector Index*** |
|------------------|-----------------------|---------------|----------------------|-----------------|
| 16–22 June       | <i>Culex tarsalis</i> | 6.2           | 0                    | 0               |
|                  | <i>Aedes vexans</i>   | 5,082.7       | 0.005                | 0.03            |
|                  | Other species         | 816.3         | 0.03                 | 0.02            |
| 23–29 June       | <i>Culex tarsalis</i> | 9.6           | 0                    | 0               |
|                  | <i>Aedes vexans</i>   | 3,268.6       | 0                    | 0               |
|                  | Other species         | 839.1         | 0                    | 0               |
| 30 June–6 July   | <i>Culex tarsalis</i> | 133.9         | 0.93                 | 0.12            |
|                  | <i>Aedes vexans</i>   | 8371.1        | 0                    | 0               |
|                  | Other species         | 1,101.8       | 0                    | 0               |
| 7–13 July        | <i>Culex tarsalis</i> | 215.7         | 0.25                 | 0.05            |
|                  | <i>Aedes vexans</i>   | 9,393.5       | 0.01                 | 0.09            |
|                  | Other species         | 1,305.4       | 0                    | 0               |
| 14–20 July       | <i>Culex tarsalis</i> | 189           | 1.32                 | 0.25            |
|                  | <i>Aedes vexans</i>   | 7,141.3       | 0.02                 | 0.14            |
|                  | Other species         | 690           | 0.10                 | 0.07            |
| 21–27 July       | <i>Culex tarsalis</i> | 221.7         | 1.08                 | 0.24            |
|                  | <i>Aedes vexans</i>   | 1,892.9       | 0.07                 | 0.13            |
|                  | Other species         | 338.2         | 0                    | 0               |
| 28 July–3 August | <i>Culex tarsalis</i> | 239.4         | 1.43                 | 0.34            |
|                  | <i>Aedes vexans</i>   | 2,411.1       | 0.14                 | 0.34            |
|                  | Other species         | 595.7         | 0.04                 | 0.02            |
| 4–10 August      | <i>Culex tarsalis</i> | 192.2         | 2.75                 | 0.53            |
|                  | <i>Aedes vexans</i>   | 2,183.1       | 0.11                 | 0.24            |
|                  | Other species         | 246.2         | 0.15                 | 0.04            |
| 11–17 August     | <i>Culex tarsalis</i> | 63.9          | 3.96                 | 0.25            |
|                  | <i>Aedes vexans</i>   | 744.9         | 0.03                 | 0.02            |
|                  | Other species         | 75.7          | 0.28                 | 0.02            |
| 18–24 August     | <i>Culex tarsalis</i> | 82.1          | 4.98                 | 0.41            |
|                  | <i>Aedes vexans</i>   | 1,033.6       | 0.04                 | 0.04            |
|                  | Other species         | 102.1         | 0.2                  | 0.02            |
| 25–31 August     | <i>Culex tarsalis</i> | 79.9          | 3.93                 | 0.31            |
|                  | <i>Aedes vexans</i>   | 277.2         | 0.16                 | 0.04            |
|                  | Other species         | 93.5          | 0.24                 | 0.02            |
| 1–7 September    | <i>Culex tarsalis</i> | 16.2          | 8.07                 | 0.13            |
|                  | <i>Aedes vexans</i>   | 1,100.6       | 0.05                 | 0.06            |
|                  | Other species         | 211.9         | 0                    | 0               |
| 8–14 September   | <i>Culex tarsalis</i> | 3.6           | 5.64                 | 0.02            |
|                  | <i>Aedes vexans</i>   | 1,199.9       | 0.02                 | 0.02            |
|                  | Other species         | 100.8         | 0                    | 0               |

\*The other species were: *Coquillettidia perturbans*, *Culiseta inornata*, *Ochlerotatus dorsalis*, *Ochlerotatus flavescens*, *Ochlerotatus spencerii*, *Ochlerotatus triseriatus*, and *Ochlerotatus trivittatus*.

\*\*Maximum likelihood estimate of the infection rate (MLE).<sup>1</sup>

\*\*\*Vector Index = Average number per trap X WNV infection rate /1000.<sup>42</sup>

SUPPLEMENTAL TABLE 10

Cache Valley virus isolations from North Dakota mosquitoes, 2003 and 2005

| Mosquito species                | Year | County   | Total no. mosquitoes (pools) | No. virus isolations | Infection rate (95% CI) <sup>1</sup> |
|---------------------------------|------|----------|------------------------------|----------------------|--------------------------------------|
| <i>Aedes vexans</i>             | 2005 | Cass     | 442,944 (9,234)              | 18                   | 0.04 (0.02–0.06)                     |
|                                 |      | Williams | 1,022,184 (20,640)           | 74                   | 0.07 (0.06–0.09)                     |
| <i>Aedes cinereus</i>           | 2005 | Williams | 5,832 (245)                  | 3                    | 0.52 (0.14–1.4)                      |
| <i>Anopheles earlei</i>         | 2005 | Williams | 61 (26)                      | 1                    | 16.55 (0.96–78.73)                   |
| <i>Culex tarsalis</i>           | 2005 | Cass     | 38,435 (1,161)               | 3                    | 0.08 (0.02–0.21)                     |
|                                 |      | Williams | 10,023 (388)                 | 1                    | 0.10 (0.01–0.48)                     |
| <i>Culiseta inornata</i>        | 2003 | Nelson   | 616 (71)                     | 1                    | 1.66 (0.09–8.19)                     |
|                                 |      | Cass     | 11,769 (447)                 | 22                   | 1.94 (1.25–2.89)                     |
|                                 |      | Williams | 9,671 (451)                  | 4                    | 0.41 (0.13–0.99)                     |
| <i>Ochlerotatus dorsalis</i>    | 2005 | Cass     | 26,767 (743)                 | 10                   | 0.38 (0.19–0.67)                     |
|                                 |      | Williams | 10,110 (454)                 | 5                    | 0.50 (0.18–1.10)                     |
| <i>Ochlerotatus flavescens</i>  | 2005 | Williams | 758 (220)                    | 1                    | 1.32 (0.08–6.36)                     |
| <i>Ochlerotatus melanimon</i>   | 2005 | Williams | 35,223 (893)                 | 6                    | 0.17 (0.07–0.35)                     |
| <i>Ochlerotatus trivittatus</i> | 2003 | Cass     | 14,021 (351)                 | 1                    | 0.07 (0.0–0.35)                      |
|                                 |      | Williams | 35,645 (872)                 | 1                    | 0.03 (0.0–0.14)                      |

SUPPLEMENTAL TABLE 11  
Jamestown Canyon virus isolations from North Dakota mosquitoes, 2003–2006

| Mosquito species                | Year | County   | Total no. mosquitoes (pools) | No. virus isolations | Infection rate (95% CI) <sup>1</sup> |
|---------------------------------|------|----------|------------------------------|----------------------|--------------------------------------|
| <i>Aedes vexans</i>             | 2003 | Nelson   | 84,432 (1,726)               | 4                    | 0.05 (0.02–0.11)                     |
|                                 |      | Cass     | 139,261 (2,863)              | 11                   | 0.08 (0.04–0.14)                     |
|                                 | 2004 | Cass     | 235,560 (4,870)              | 4                    | 0.02 (0.1–0.04)                      |
|                                 |      | Cass     | 442,944 (9,234)              | 3                    | 0.01 (0.0–0.02)                      |
| <i>Culex tarsalis</i>           | 2005 | Williams | 1,022,184 (20,640)           | 36                   | 0.04 (0.03–0.05)                     |
|                                 |      | Cass     | 13,733 (423)                 | 1                    | 0.07 (0.0–0.35)                      |
| <i>Culiseta inornata</i>        | 2005 | Cass     | 38,435 (1,161)               | 1                    | 0.03 (0.0–0.13)                      |
|                                 |      | Cass     | 11,769 (447)                 | 2                    | 0.17 (0.03–0.56)                     |
| <i>Ochlerotatus dorsalis</i>    | 2003 | Nelson   | 837 (89)                     | 1                    | 1.21 (0.07–5.98)                     |
|                                 |      | Cass     | 8,835 (357)                  | 3                    | 0.34 (0.09–0.92)                     |
|                                 | 2005 | Cass     | 26,767 (793)                 | 2                    | 0.07 (0.1–0.24)                      |
|                                 |      | Williams | 10,110 (454)                 | 1                    | 0.10 (0.01–0.48)                     |
| <i>Ochlerotatus flavescens</i>  | 2006 | Williams | 1,375 (194)                  | 1                    | 0.72 (0.04–3.49)                     |
|                                 |      | Williams | 310 (87)                     | 1                    | 3.18 (0.14–15.21)                    |
| <i>Ochlerotatus melanimon</i>   | 2004 | Williams | 8,210 (224)                  | 1                    | 0.12 (0.01–0.59)                     |
|                                 |      | Williams | 35,223 (893)                 | 1                    | 0.03 (0.0–0.14)                      |
| <i>Ochlerotatus sticticus</i>   | 2005 | Cass     | 23,890 (629)                 | 1                    | 0.04 (0.0–0.20)                      |
| <i>Ochlerotatus trivittatus</i> | 2003 | Richland | 1,973 (45)                   | 1                    | 0.51 (0.03–2.47)                     |
|                                 |      | Cass     | 91,993 (2,007)               | 2                    | 0.02 (0.0–0.07)                      |
|                                 | 2005 | Cass     | 97,325 (2,106)               | 5                    | 0.05 (0.02–0.11)                     |
|                                 |      | Williams | 35,645 (872)                 | 4                    | 0.11 (0.04–0.27)                     |

SUPPLEMENTAL TABLE 12  
Trivittatus virus isolations from North Dakota mosquitoes, 2003–2006

| Mosquito species                | Year     | County       | Total no. mosquitoes (pools) | No. virus isolations | Infection rate (95% CI) <sup>1</sup> |
|---------------------------------|----------|--------------|------------------------------|----------------------|--------------------------------------|
| <i>Aedes vexans</i>             | 2003     | Cass         | 134,510 (2,762)              | 23                   | 0.17 (0.11–0.25)                     |
|                                 |          | Richland     | 4,751 (101)                  | 2                    | 0.42 (0.08–1.38)                     |
|                                 | 2004     | Cass         | 235,560 (4,870)              | 6                    | 0.03 (0.01–0.05)                     |
|                                 |          | Williams     | 260,426 (5,265)              | 4                    | 0.02 (0.00–0.04)                     |
|                                 | 2005     | Cass         | 442,944 (9,234)              | 15                   | 0.03 (0.02–0.05)                     |
|                                 |          | Richland     | 12,505 (281)                 | 2                    | 0.16 (0.03–0.52)                     |
|                                 |          | Williams     | 1,022,184 (20,640)           | 22                   | 0.02 (0.01–0.03)                     |
| <i>Culex tarsalis</i>           | 2006     | Williams     | 591,152 (11,947)             | 3                    | 0.01 (0.00–0.01)                     |
|                                 |          | Cass         | 13,733 (423)                 | 1                    | 0.07 (0–0.35)                        |
| <i>Ochlerotatus dorsalis</i>    | 2005     | Williams     | 6,616 (204)                  | 1                    | 0.15 (0.01–0.73)                     |
|                                 |          | Williams     | 10,110 (454)                 | 1                    | 0.10 (0.01–0.48)                     |
| <i>Ochlerotatus melanimon</i>   | 2005     | Williams     | 35,223 (893)                 | 1                    | 0.03 (0.0–0.14)                      |
| <i>Ochlerotatus sticticus</i>   | 2005     | Cass         | 23,840 (629)                 | 3                    | 0.13 (0.03–0.34)                     |
| <i>Ochlerotatus trivittatus</i> | 2003     | Cass         | 14,021 (351)                 | 12                   | 0.87 (0.47–1.48)                     |
|                                 |          | Richland     | 1,973 (45)                   | 9                    | 5.05 (2.49–9.30)                     |
|                                 | 2004     | Cass         | 91,986 (2,006)               | 78                   | 0.87 (0.69–1.07)                     |
|                                 |          | Richland     | 963 (35)                     | 1                    | 1.04 (0.06–5.11)                     |
|                                 |          | Williams     | 1,948 (97)                   | 9                    | 5.09 (2.50–9.39)                     |
|                                 | 2005     | Cass         | 97,325 (2,106)               | 105                  | 1.11 (0.91–1.34)                     |
|                                 |          | Richland     | 2,903 (69)                   | 2                    | 0.70 (0.12–2.28)                     |
|                                 |          | Williams     | 35,645 (872)                 | 49                   | 1.42 (1.06–1.86)                     |
| 2006                            | Williams | 12,757 (349) | 30                           | 2.48 (1.71–3.50)     |                                      |

SUPPLEMENTAL TABLE 13  
Western equine encephalomyelitis, Snowshoe hare, and Potosi viruses isolations from North Dakota mosquitoes, 2004 and 2005

| Virus                            | Mosquito species                | Year | County   | Total no. mosquitoes (pools) | No. virus isolations | Infection rate (95% CI) <sup>1</sup> |
|----------------------------------|---------------------------------|------|----------|------------------------------|----------------------|--------------------------------------|
| Western equine encephalomyelitis | <i>Culex tarsalis</i>           | 2004 | Williams | 6,616 (204)                  | 2                    | 0.30 (0.05–0.99)                     |
| Snowshoe hare                    | <i>Ochlerotatus trivittatus</i> | 2004 | Cass     | 91,986 (2,006)               | 1                    | 0.01 (0.0–0.05)                      |
|                                  |                                 | 2005 | Cass     | 442,944 (9,234)              | 3                    | 0.01 (0.0–0.02)                      |
| Potosi                           | <i>Aedes vexans</i>             | 2005 | Cass     | 442,944 (9,234)              | 4                    | 0.01 (0–0.02)                        |
|                                  | <i>Ochlerotatus dorsalis</i>    | 2005 | Cass     | 26,767 (743)                 | 1                    | 0.04 (0.0–0.18)                      |
|                                  | <i>Culiseta inornata</i>        | 2005 | Cass     | 11,769 (447)                 | 1                    | 0.08 (0.0–0.41)                      |



## REFERENCES

- Biggerstaff BJ, 2006. *PooledInfRate, Version 3.0: a Microsoft Excel Add-In to compute prevalence estimates from pooled samples*. Fort Collins, CO: Centers for Disease Control and Prevention.
- Turell MJ, O'Guinn ML, Dohm DJ, Jones JW, 2001. Vector competence of North American mosquitoes (Diptera: Culicidae) for West Nile virus. *J Med Entomol* 38: 130–134.
- Tiawsirisup S, Kinley JR, Tucker BJ, Evans RB, Rowley WA, Platt KB, 2008. Vector competence of *Aedes vexans* (Diptera: Culicidae) for West Nile virus and potential as an enzootic vector. *J Med Entomol* 45: 452–457.
- Goddard LB, Roth AE, Reisen WK, Scott TW, 2002. Vector competence of California mosquitoes for West Nile virus. *Emerg Infect Dis* 8: 1385–1391.
- Ritchie SA, Rowley WA, 1981. Blood-feeding patterns of Iowa mosquitoes. *Mosq News* 41: 271–275.
- Cupp EW, Stokes G, 1973. Identification of bloodmeals from mosquitoes collected in light traps and dog-baited traps. *Mosq News* 33: 39–41.
- Nasci RS, 1984. Variations in the blood-feeding patterns of *Aedes vexans* and *Aedes trivittatus* (Diptera: Culicidae). *J Med Entomol* 21: 95–99.
- Edman JD, Downe AER, 1964. Host-blood sources and multiple-feeding habits of mosquitoes in Kansas. *Mosq News* 24: 154–160.
- Molaei G, Andreadis TG, 2006. Identification of avian- and mammalian-derived bloodmeals in *Aedes vexans* and *Culiseta melanura* (Diptera: Culicidae) and its implication for West Nile virus transmission in Connecticut, U.S.A. *J Med Entomol* 43: 1088–1093.
- Shemanchuk JA, Downe AER, Burgess L, 1963. Hosts of mosquitoes (Diptera: Culicidae) from the irrigated areas of Alberta. *Mosq News* 23: 336–341.
- Tempelis CH, Francy DB, Hayes RO, Lofy MF, 1967. Variations in feeding patterns of seven culicine mosquitoes on vertebrate hosts in Weld and Larimer Counties, Colorado. *Am J Trop Med Hyg* 16: 111–119.
- Hayes RO, Tempelis CH, Hess AD, Reeves WC, 1973. Mosquito hosts preference studies in Hale County, Texas. *Am J Trop Med Hyg* 22: 270–277.
- Reeves WC, Hammon WM, 1944. Feeding habits of the proven and possible mosquito vectors of western equine and St. Louis encephalitis in the Yakima Valley, Washington. *Am J Trop Med Hyg* 24: 131–134.
- Edman JD, 1971. Host-feeding patterns of Florida mosquitoes I. *Aedes*, *Anopheles*, *Coquillettidia*, *Mansonia* and *Psorophora*. *J Med Entomol* 8: 687–695.
- Apperson CS, Harrison BA, Unnasch TR, Hassan HK, Irby WS, Savage HM, Aspen SE, Watson DW, Rueda LM, Engber BR, Nasci RS, 2002. Host-feeding habits of *Culex* and other mosquitoes (Diptera: Culicidae) in the Borough of Queens in New York City, with characters and techniques for identification of *Culex* mosquitoes. *J Med Entomol* 39: 777–785.
- Irby WS, Apperson CS, 1988. Hosts of mosquitoes in the coastal plain of North Carolina. *J Med Entomol* 25: 85–93.
- Nasci RS, Edman JD, 1981. Blood-feeding patterns of *Culiseta melanura* (Diptera: Culicidae) and associated sylvan mosquitoes in southeastern Massachusetts eastern equine encephalitis enzootic foci. *J Med Entomol* 18: 493–500.
- Apperson CS, Hassan HK, Harrison BA, Savage HM, Aspen SE, Farajollahi A, Crans W, Daniels TJ, Falco RC, Benedict M, Anderson M, McMillen L, Unnasch TR, 2004. Host feeding patterns of established and potential mosquito vectors of West Nile virus in the eastern United States. *Vector-Borne Zoonotic Dis* 4: 71–82.
- Gingrich JB, Williams GM, 2005. Host-feeding patterns of suspected West Nile virus mosquito vectors in Delaware, 2001–2002. *J Am Mosq Control Assoc* 21: 194–200.
- Magnarelli LA, 1977. Host feeding patterns of Connecticut mosquitoes (Diptera: Culicidae). *Am J Trop Med Hyg* 26: 547–552.
- Sardelis MR, Turell MJ, Dohm DJ, O'Guinn ML, 2001. Vector competence of selected North American *Culex* and *Coquillettidia* mosquitoes for West Nile virus. *Emerg Infect Dis* 7: 1018–1022.
- Molaei G, Andreadis TG, Armstrong PM, Diuk-Wasser M, 2008. Host-feeding patterns of potential mosquito vectors in Connecticut, U.S.A.: molecular analysis of bloodmeals from 23 species of *Aedes*, *Anopheles*, *Culex*, *Coquillettidia*, *Psorophora*, and *Uranotaenia*. *J Med Entomol* 45: 1143–1151.
- Tempelis CH, 1974. Host-feeding patterns of mosquitoes, with a review of advances in analysis of blood meals by serology. *J Med. Entomol.* 11: 635–653.
- Downe AER, 1962. Some aspects of host selection by *Mansonia perturbans* (Walk.) (Diptera: Culicidae). *Can J Zool* 40: 725–732.
- Suyemoto W, Schiefer BA, Elderidge B, 1973. Precipitin tests of blood-fed mosquitoes collected during the VEE surveillance survey in the southern United States in 1971. *Mosq News* 33: 392–395.
- Anderson JF, Main AJ, Cheng G, Ferrandino FJ, Fikrig E, 2012. Horizontal and vertical transmission of West Nile virus genotype NY99 by *Culex salinarius* and genotypes NY99 and WN02 by *Culex tarsalis*. *Am J Trop Med Hyg* 86: 134–139.
- Andersen DM, Collett, GC, Winget, RN, 1967. Preliminary host preference studies of *Culex tarsalis* Coquillett and *Culiseta inornata* (Williston) in Utah. *Mosq News* 27: 12–15.
- Reeves WC, Tempelis CH, Bellamy RE, Lofy MF, 1963. Observations on the feeding habits of *Culex tarsalis* in Kern County, California, using precipitating antisera produced in birds. *Am J Trop Med Hyg* 12: 929–935.
- Tempelis CH, Reeves WC, Bellamy RE, Lofy MF, 1965. A three-year study of the feeding habits of *Culex tarsalis* in Kern County, California. *Am J Trop Med Hyg* 14: 170–177.
- Tempelis CH, Washino RK, 1967. Host-feeding patterns of *Culex tarsalis* in the Sacramento Valley, California, with notes on other species. *J Med Entomol* 4: 315–318.
- Lee JH, Hassan H, Hill G, Cupp EW, Higazi TB, Mitchell CJ, Godsey MSJr., Unnasch TR, 2002. Identification of mosquito avian-derived blood meals by polymerase chain reaction-heteroduplex analysis. *Am J Trop Med Hyg* 66: 599–604.
- Molaei G, Cummings RF, Su T, Armstrong PM, Williams GA, Cheng ML, Webb JP, Andreadis TG, 2010. Vector-host interactions governing epidemiology of West Nile virus in Southern California. *Am J Trop Med Hyg* 83: 1269–82.
- Kent R, Juliusson L, Weissmann M, Evans S, Komar N, 2009. Seasonal blood-feeding behavior of *Culex tarsalis* (Diptera: Culicidae) in Weld County, Colorado, 2007. *J Med Entomol* 46: 380–390.
- Thiemann TC, Lemenager DA, Klueh S, Carroll BD, Lothrop HD, Reisen WK, 2012. Spatial variation in host feeding patterns of *Culex tarsalis* and the *Culex pipiens* complex (Diptera: Culicidae) in California. *J Med Entomol* 49: 903–16.
- Washino RK, Nelson RL, Reeves WC, Scrivani RP, Tempelis CH, 1962. Studies on *Culiseta inornata* as a possible vector of encephalitis viruses in California. *Mosq News* 22: 268–274.
- Edman JD, Webber LA, Kale II HW, 1972. Host-feeding patterns of Florida mosquitoes. II. *Culiseta*. *J Med Entomol* 9: 429–434.
- Erickson SM, Platt KB, Tucker BJ, Evans R, Tiawsirisup S, Rowley WA, 2006. The potential of *Aedes triseriatus* (Diptera: Culicidae) as an enzootic vector of West Nile virus. *J Med Entomol* 43: 966–970.
- Burkot TR, DeFoliart, GR, 1982. Bloodmeal sources of *Aedes triseriatus* and *Aedes vexans* in a southern Wisconsin forest endemic for La Crosse encephalitis virus. *Am J Trop Med Hyg* 31: 376–381.
- Tiawsirisup S, Platt KB, Evans RB, Rowley WA, 2005. A comparison of West Nile virus transmission by *Ochlerotatus trivittatus* (Coq.), *Culex pipiens* (L.), and *Aedes albopictus* (Skuse). *Vector-Borne Zoonotic Dis* 5: 40–47.
- Nasci RS, 1984. Variations in the blood-feeding patterns of *Aedes vexans* and *Aedes trivittatus* (Diptera: Culicidae). *J Med Entomol* 21: 95–99.
- Kilpatrick AM, Kramer LD, Campbell SR, Alleyne EO, Dobson AP, Daszak P, 2005. West Nile virus risk assessment and the bridge vector paradigm. *Emerg Infect Dis* 11: 425–429.
- Centers for Disease Control and Prevention, 2013. West Nile virus in the United States: Guidelines for surveillance, prevention, and control. <http://www.cdc.gov/westnile/vectorcontrol/index.html>. 1–69. Accessed August 13, 2014.
